# Supplementary material for: The N-terminal domain of rhamnosyltransferase EpsF influences exopolysaccharide chain length determination in Streptococcus thermophilus 05-34
Source: PubMed Central journal article supplement (PMC7023835; doi:10.7717/peerj.8524), 2020-02-12

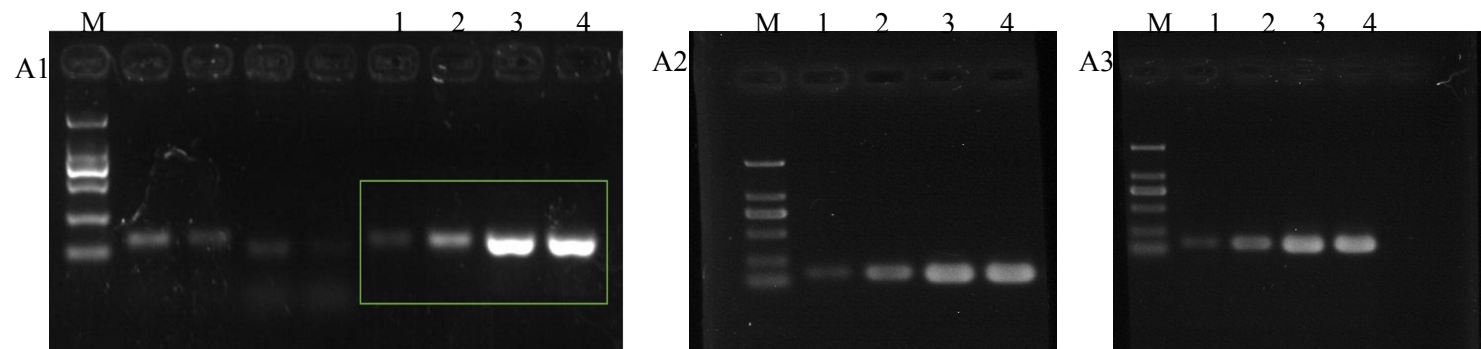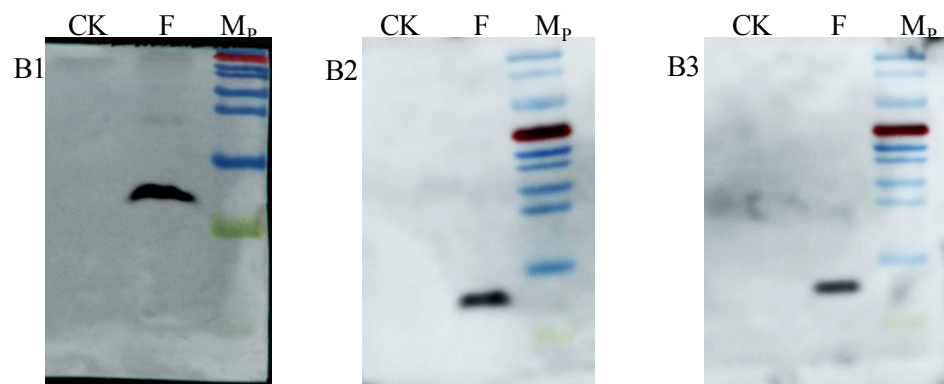

Supplement: peerj-08-8524-s002.pdf [file peerj-08-8524-s002.pdf]
